# Supplementary material for: Indium Tin Oxide-Free Inverted Organic Photovoltaics Using Laser-Induced Forward Transfer Silver Nanoparticle Embedded Metal Grids
Source: PubMed Central journal article supplement (PMC9245438; doi:10.1021/acsaelm.2c00217), 2022-06-02
Supplement: el2c00217_si_001.pdf [file el2c00217_si_001.pdf]

# Supporting Information

Indium Tin Oxide-Free Inverted Organic

Photovoltaics using Laser Induced Forward Transfer

Silver Nanoparticle Embedded Metal Grids

*Sergey M. Pozov<sup>1</sup>, Kostas Andritsos<sup>2</sup>, Ioannis Theodorakos<sup>2</sup>, Efthymios Georgiou<sup>1</sup>, Apostolos*

*Ioakeimidis<sup>1</sup>, Ayala Kabla<sup>3</sup>, Semyon Melamed<sup>3</sup>, Fernando de la Vega<sup>3</sup>, Ioanna Zergioti<sup>2</sup> and*

*Stelios A. Choulis<sup>1\*</sup>*

\*Corresponding Author: [stelios.choulis@cut.ac.cy](mailto:stelios.choulis@cut.ac.cy)

<sup>1</sup> Molecular Electronics and Photonics Research Unit, Department of Mechanical Engineering

and Materials Science and Engineering, Cyprus University of Technology, Limassol, 3603,

Cyprus

<sup>2</sup> School of Applied Mathematical and Physical Sciences, National Technical University of

Athens, Iroon Polytechniou 9, 15780, Athens, Greece

<sup>3</sup> PV Nano Cell, 8 Hamasger St., Migdal HaEmek, 2310102, Israel

## Tables

**Table S 1: Photovoltaic parameters of the best performed ITO-based and ITO-free inverted OPV devices using 700nm thick PEDOT:PSS HIL-E100 formulation. As laser-printed (not embedded)**

Ag nps 9-line grid was used.

| Device                                                    | $V_{oc}$ [V] | $J_{sc}$ [mA/cm <sup>2</sup> ] | $FF$ [%] | $PCE$ [%] |
|-----------------------------------------------------------|--------------|--------------------------------|----------|-----------|
| ITO/ZnO/PM6:Y6/MoO <sub>3</sub> /Ag<br>(global reference) | 0.80         | 24.2                           | 69.6     | 13.5      |
| ITO/HIL-E100/ZnO/PM6:Y6/MoO <sub>3</sub> /Ag              | 0.78         | 22.9                           | 59.2     | 10.6      |
| EMB-9/HIL-E100/ZnO/PM6:Y6/MoO <sub>3</sub> /Ag            | 0.70         | 17.9                           | 29.8     | 3.7       |

**Table S 2: Photovoltaic parameters of the best performed ITO-free OPVs with laser-printed and embedded Ag nps 9-line grid, using three different PEDOT:PSS formulations, PH, PH500 and HIL-E100.**

| Device                                         | $V_{oc}$ [V] | $J_{sc}$ [mA/cm <sup>2</sup> ] | $FF$ [%] | $PCE$ [%] |
|------------------------------------------------|--------------|--------------------------------|----------|-----------|
| ITO/PH/ZnO/PM6:Y6/MoO <sub>3</sub> /Ag         | 0.80         | 19.8                           | 54.5     | 8.6       |
| ITO/HIL-E100/ZnO/PM6:Y6/MoO <sub>3</sub> /Ag   | 0.78         | 22.9                           | 59.2     | 10.6      |
| ITO/PH500/ZnO/PM6:Y6/MoO <sub>3</sub> /Ag      | 0.76         | 26.8                           | 59.6     | 12.1      |
| EMB-9/PH/ZnO/PM6:Y6/MoO <sub>3</sub> /Ag       | 0.76         | 7.5                            | 34.3     | 1.9       |
| EMB-9/HIL-E100/ZnO/PM6:Y6/MoO <sub>3</sub> /Ag | 0.76         | 16.8                           | 37.1     | 4.7       |
| EMB-9/PH500/ZnO/PM6:Y6/MoO <sub>3</sub> /Ag    | 0.76         | 22.5                           | 52.5     | 8.9       |

## Figure Captions

**Figure S 1.** Investigation of ITO-free inverted OPV devices using the as printed not embedded Ag nps 9-line grid, a) cross-section profiles of the as laser-printed Ag nps grids on glass substrate, together with cross-section profiles after the coating of each functional layer. b) Illuminated *JV* characteristics of best performed ITO-based and ITO-free inverted OPVs using 700nm thick PEDOT:PSS HIL-E100 formulation.

**Figure S 2.** Atomic force microscopy images of Ag nps grid, a) before and b) after embedding process.

**Figure S 3.** Illuminated *JV* characteristics of the best performed ITO-free OPV devices, using embedded Ag nps 9-line (EMB-9) grid, with three different PEDOT:PSS formulations, PH, PH500 and HIL-E100.

**Figure S 4:** Profilometric analysis of the LIFT-printed and laser sintered Ag nps grid, a) as-printed, b) as-embedded and coated with PEDOT:PSS PH500 ~40nm layer followed by annealing at 140°C – 20 minutes.

**Figure S 5.** Photocurrent mapping images of 9 mm<sup>2</sup> inverted OPV devices, ITO-based reference ITO-free OPV devices, with different number of laser-printed parallel line embedded Ag grids.

The reference device in that case was ITO/PH500/ZnO/PM6:Y6/MoO<sub>3</sub>/Ag.

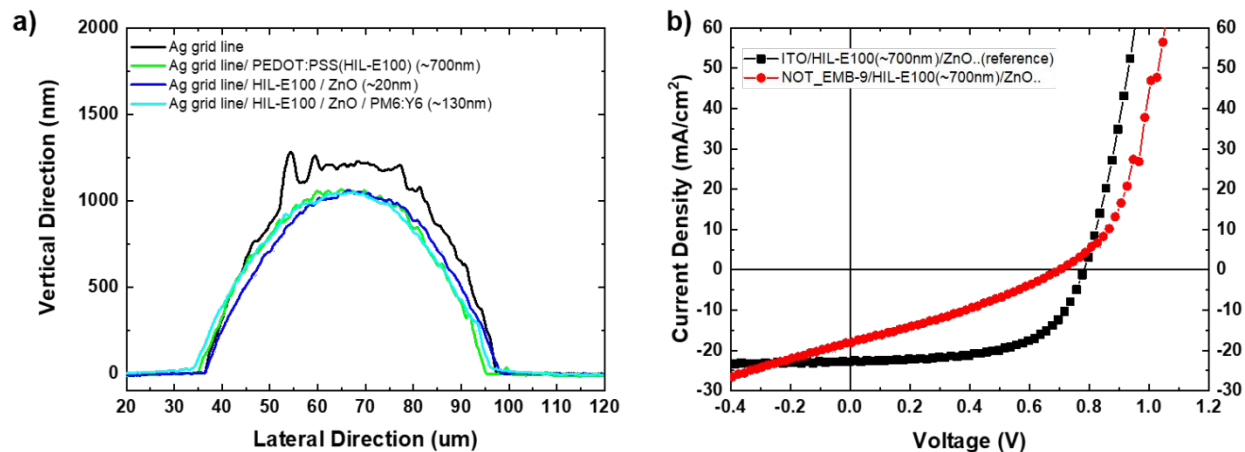

Figure S 1

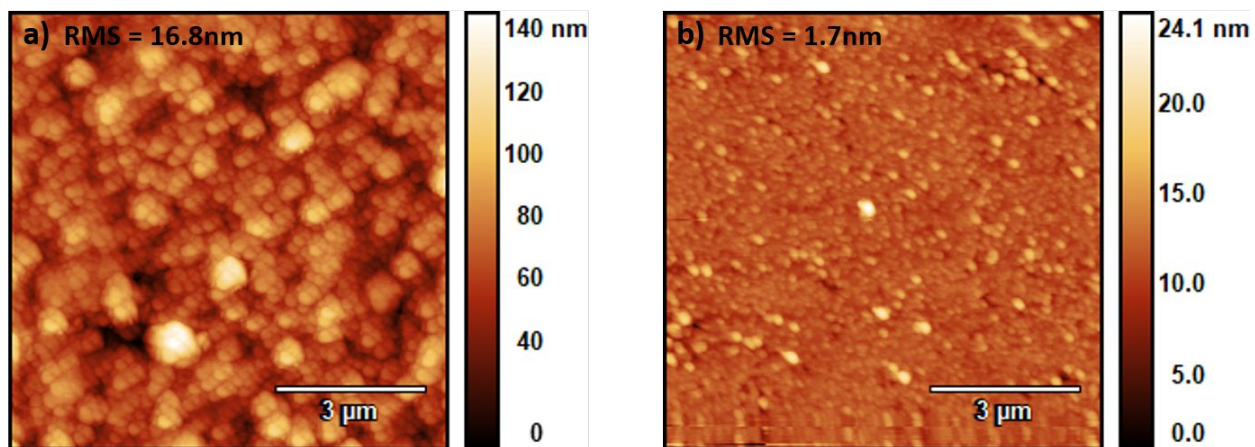

Figure S 2

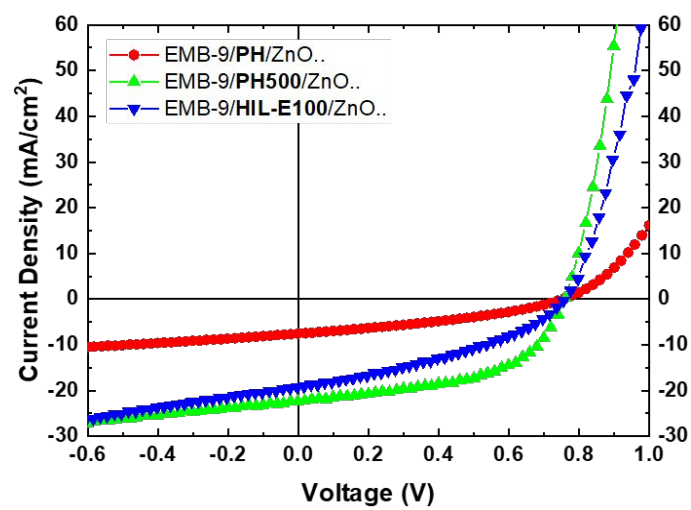

Figure S 3





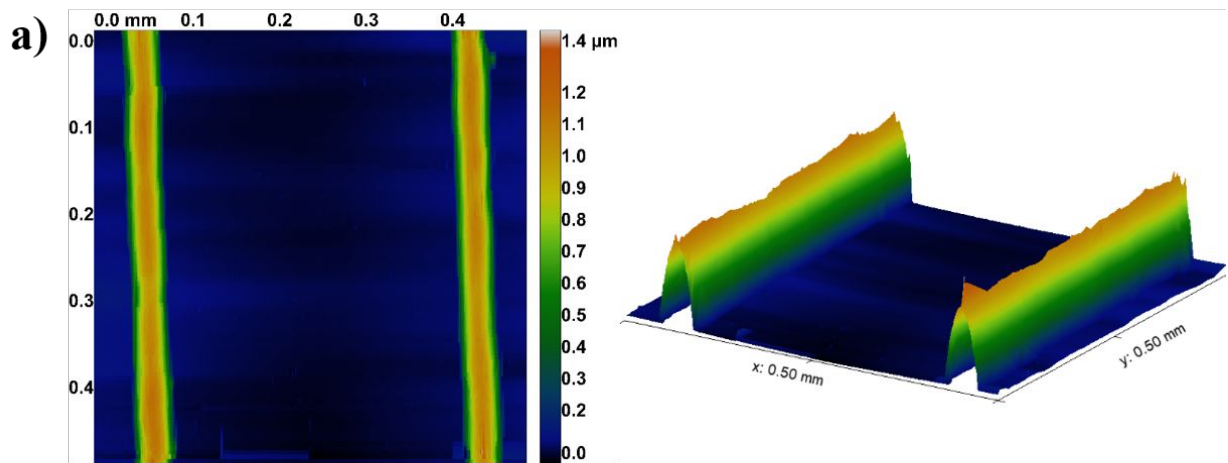

LIFT-printed and laser-sintered Ag nps grid

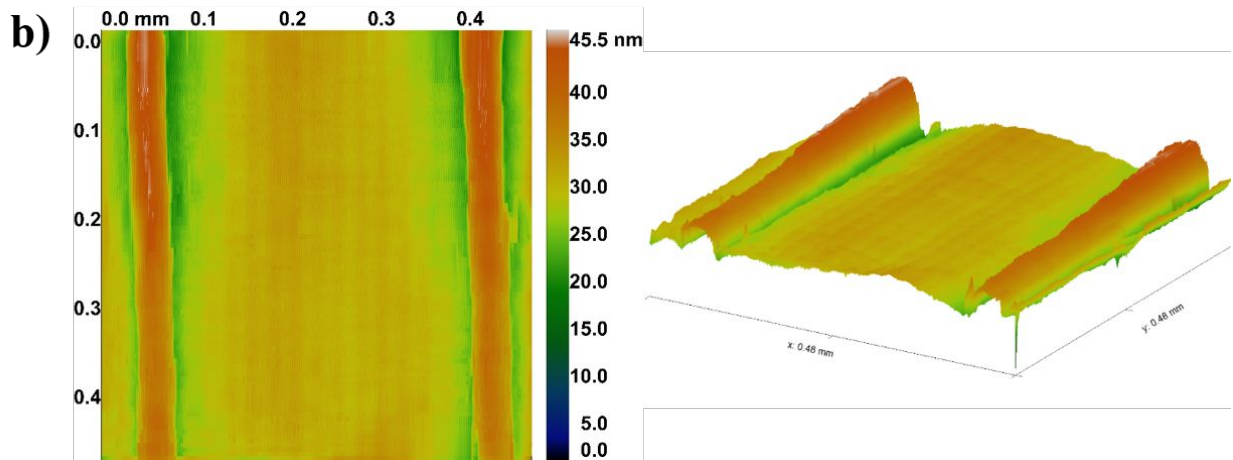

LIFT-printed and laser-sintered and **EMBEDDED** Ag nps grid/PH500 (~ 40nm) - annealed

Figure S 4

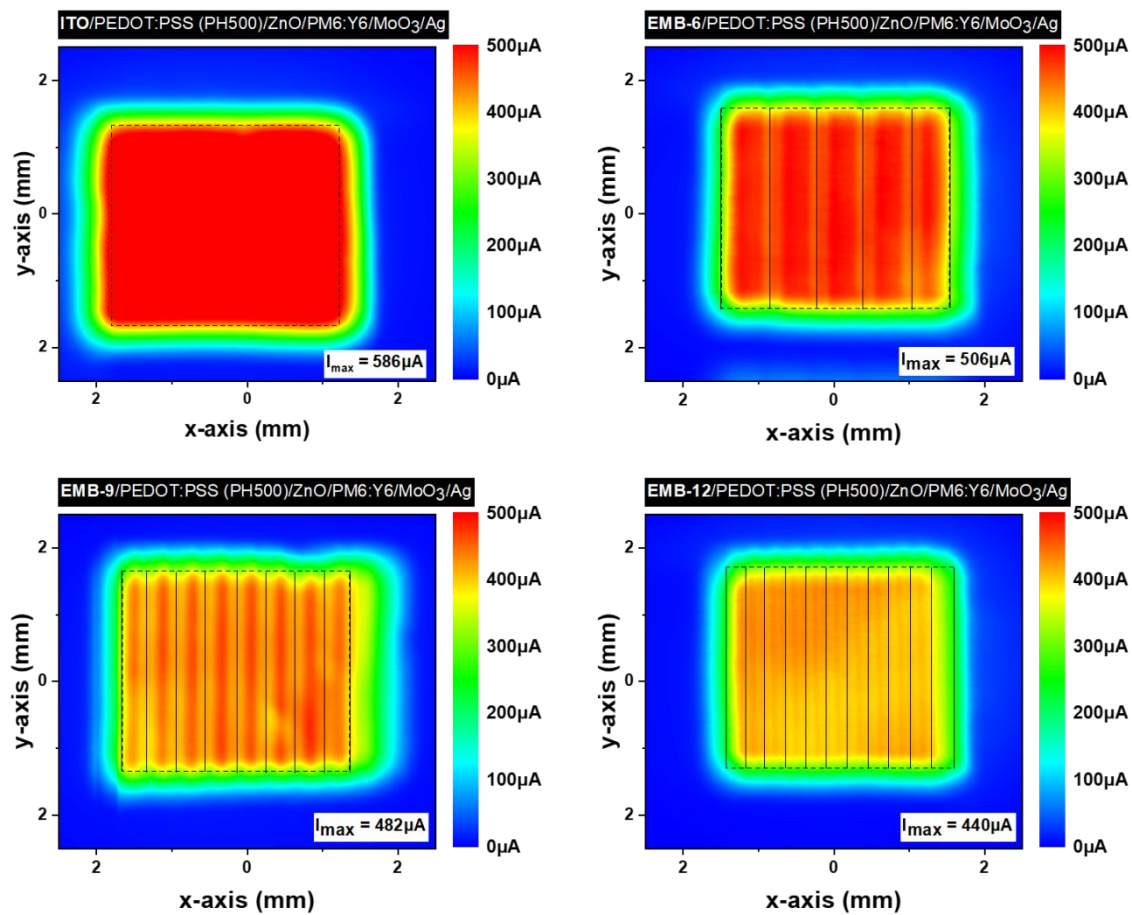

Figure S 5
